# Supplementary material for: Soil microbial legacies differ following drying-rewetting and freezing-thawing cycles
Source: PubMed Central journal article supplement (PMC8115648; doi:10.1038/s41396-020-00844-3), 2021-01-06
Supplement: 41396_2020_844_MOESM1_ESM.pdf [file 41396_2020_844_MOESM1_ESM.pdf]

## Additional methods

### qPCR of prokaryotes and fungi

Bacterial abundance in the soil samples was measured by quantifying the V3 region of 16S rDNA as described previously [1]. Briefly, the PCR mixture contained 1 µl of the forward EUB338 and 1 µl of the reverse EUB518 primer [2] (0.2 µM final concentration of both primers), 12.5 µl of the Brilliant III Ultra-Fast SYBR® Green QPCR Master Mix (Agilent), 8.5 µl of molecular grade water and 2 µl of 10x diluted cDNA or 100x diluted DNA template. The total amount of DNA added to the qPCR reaction was around 1 ng and the total amount of cDNA added was in the range of 3-20 ng. PCR was performed as follows: 95°C for 10 min, followed by 45 cycles of denaturation at 95°C for 10s, annealing at 56°C for 10s, and extension at 72°C for 13s and a final dissociation curve. The standard curve was made from DNA isolated from *E.coli* [3]. Fungal abundance in the soil samples was measured by quantifying the ITS2 region as described previously [4]. The PCR mixture contained 1 µl of the forward primer gITS7 [5], 1 µl of the reverse primer ITS4 [6] (0.2 µM final concentration of both primers), 10 µl of Brilliant III Ultra-Fast SYBR® Green QPCR Master Mix (Agilent), 7 µl of RNA free water and 1 µl of 10x diluted cDNA or 100x diluted DNA template. PCR conditions were 95 °C for 2 min, followed by 40 cycles of 95 °C for 10 s, 56 °C for 20 s, 72 °C for 45 s, an extension step of 72 °C for 6 min and a final dissociation curve. The standard curve was made from a plasmid that contained the ITS fragment of *Aureobasidium pullulans*.

### Preparation for sequencing of prokaryotic and fungal communities

The sequencing to determine the composition of prokaryotic and fungal communities for the 16S rRNA and ITS2 gene and transcripts were done as described by Borg Dahl et al. [7]. For 16S, we used the 314F and 806R primers [8-10]. For ITS2 region, we used the primers gITS7 [5] and ITS4 [6]. The PCR amplification was done in two steps. The first PCR mixture contained 15.75 µl molecular grade water, 5 µl PCR BIO 5 x reaction buffer, 0.25 µl PCR BIO Hifi Polymerase (PCR Biosystems, London, UK), 1 µl of each forward and reverse primer (0.2 µM final concentration) and 2 µl of diluted template (see above). The PCR conditions were the following: 95 °C for 1 min followed by 30 cycles of 95 °C for 15 seconds, 56°C for 15 seconds and 72°C for 30 seconds. Then there was a final extension at 70 °C for 3 min. PCR products were checked on agarose gels. First PCR was performed in technical triplicates to minimize PCR bias [11], which were pooled after the first PCR. After pooling technical replicates, PCR products were purified by Agencourt AMPure XP (Beckman Coulter). Addition of adaptors and indices was done in a second PCR reaction that contained 15.75 µl molecular grade water, 5 µl PCR BIO 5 x reaction buffer, 0.25 µl PCR BIO Hifi Polymerase (PCR biosystems), 1 µl of each of the forward and reverse primer that contained adaptor and index and 2 µl of the cleaned PCR product (see above). The PCR conditions were the following: 95 °C for 1 min followed by 15 cycles of 95 °C for 15 seconds, 56°C for 15 seconds and 72°C for 30 seconds. Then there was a final extension at 70 °C for 3 min. The PCR product were checked on a gel and purified using Agencourt AMPure XP (Beckman Coulter).

The cleaned and indexed PCR products were pooled by adding equal amounts of DNA to a 1.5 ml tube. The sample pool was concentrated using the DNA clean-and-concentrator-5 kit (Zymo Research, Irvine, California, USA) and prepared for sequencing using the MiSeq reagent kit v2 (500 cycles) and paired-end sequenced on the Illumina MiSeq platform (Illumina Inc., San Diego, California, USA) at the Section of Microbiology, University of Copenhagen.

### Annotation

For 16S cDNA and DNA, raw reads were trimmed of adaptor, indices and primer sequences using *cutadapt* [12]. Only read pairs having both primers were retained. Trimmed sequences were merged (*assemble\_pairs*) and clustered in OTUs (*cluster\_otus*) with *UPARSE-OTU* algorithm [13] (97% sequence similarity, custom *BioDSL* script, <https://github.com/maasha/BioDSL>). Taxonomic annotation of OTUs was performed with *mothur* [14] naïve Bayes' classifier using Ribosomal Database Project database (*RDP*, trainset 16 [15], [https://www.mothur.org/wiki/RDP\\_reference\\_files](https://www.mothur.org/wiki/RDP_reference_files)). This implementation has been described [16] OTUs affiliated to mitochondria, chloroplasts, Eukaryotes or not affiliated to a Domain were removed (0.33% of total OTUs).

For ITS2 region cDNA and DNA, raw sequence reads were treated as above. Trimmed sequences were processed using *PIPITS* workflow [17]. Primer-free sequences were merged using *PEAR* [18] and quality-filtered using *FASTX-Toolkit* (Hannon 2010). ITS2 sequences were extracted using *ITSx* [19] and clustered into OTUs using *VSEARCH* and a (97% sequence similarity). Representative OTU sequences were chimera-checked using *UNITE-UCHIME* reference dataset. Taxonomy of chimera-free OTUs was assigned with *RDP* classifier [16] against the *UNITE* fungal ITS database version 7.2 [20]. OTUs without Domain affiliation were removed (2.73% of total OTUs).

### References

1. Nunes I, Jurburg S, Jacquiod S, Brejnrod A, Falcão Salles J, Priemé A, et al. Soil bacteria show different tolerance ranges to an unprecedented disturbance. *Biol Fertility Soils*. 2018; 54 (2): 189-202.
2. Fierer N, Jackson JA, Vilgalys R, Jackson RB. Assessment of soil microbial community structure by use of taxon-specific quantitative pcr assays. *Appl Environ Microbiol*. 2005; 71 (7): 4117-20.
3. Schostag M, Stibal M, Jacobsen CS, Bælum J, Taş N, Elberling B, et al. Distinct summer and winter bacterial communities in the active layer of svalbard permafrost revealed by DNA- and rna-based analyses. *Front Microbiol*. 2015; 6: 399.
4. Christiansen CT, Haugwitz MS, Priemé A, Nielsen CS, Elberling B, Michelsen A, et al. Enhanced summer warming reduces fungal decomposer diversity and litter mass loss more strongly in dry than in wet tundra. *Global Change Biol*. 2017; 23 (1): 406-20.
5. Ihrmark K, Bödeker ITM, Cruz-Martinez K, Friberg H, Kubartova A, Schenck J, et al. New primers to amplify the fungal its2 region – evaluation by 454-sequencing of artificial and natural communities. *FEMS Microbiol Ecol*. 2012; 82 (3): 666-77.
6. White TJ, Bruns T, Lee S, Taylor J. 38 - amplification and direct sequencing of fungal ribosomal rna genes for phylogenetics. *Pcr protocols*. San Diego: Academic Press; 1990. p. 315-22.
7. Borg Dahl M, Brejnrod AD, Russel J, Sørensen SJ, Schnittler M. Different degrees of niche differentiation for bacteria, fungi, and myxomycetes within an elevational transect in the german alps. *Microb Ecol*. 2019.
8. Sundberg C, Al-Soud WA, Larsson M, Alm E, Yekta SS, Svensson BH, et al. 454 pyrosequencing analyses of bacterial and archaeal richness in 21 full-scale biogas digesters. *FEMS Microbiol Ecol*. 2013; 85 (3): 612-26.
9. Yu Y, Lee C, Kim J, Hwang S. Group-specific primer and probe sets to detect methanogenic communities using quantitative real-time polymerase chain reaction. *Biotechnol Bioeng*. 2005; 89 (6): 670-9.

10. Neefs JM, Van de Peer Y, Hendriks L, De Wachter R. Compilation of small ribosomal subunit rna sequences. *Nucleic Acids Res.* 1990; 18 Suppl (Suppl): 2237-317.
11. Schöler A, Jacquiod S, Vestergaard G, Schulz S, Schloter M. Analysis of soil microbial communities based on amplicon sequencing of marker genes. *Biol Fertility Soils.* 2017; 53 (5): 485-9.
12. Martin M. Cutadapt removes adapter sequences from high-throughput sequencing reads. *EMBnetjournal.* 2011; 17 (1): 3.
13. Edgar RC. Uparse: Highly accurate otu sequences from microbial amplicon reads. *Nat Methods.* 2013; 10: 996.
14. Schloss PD, Westcott SL, Ryabin T, Hall JR, Hartmann M, Hollister EB, et al. Introducing mothur: Open-source, platform-independent, community-supported software for describing and comparing microbial communities. *Appl Environ Microbiol.* 2009; 75 (23): 7537-41.
15. Cole JR, Wang Q, Fish JA, Chai B, McGarrell DM, Sun Y, et al. Ribosomal database project: Data and tools for high throughput rRNA analysis. *Nucleic Acids Res.* 2013; 42 (D1): D633-D42.
16. Wang Q, Garrity GM, Tiedje JM, Cole JR. Naïve bayesian classifier for rapid assignment of rRNA sequences into the new bacterial taxonomy. *Appl Environ Microbiol.* 2007; 73 (16): 5261-7.
17. Gweon HS, Oliver A, Taylor J, Booth T, Gibbs M, Read DS, et al. Pipits: An automated pipeline for analyses of fungal internal transcribed spacer sequences from the illumina sequencing platform. *Methods in Ecology and Evolution.* 2015; 6 (8): 973-80.
18. Zhang J, Kobert K, Flouri T, Stamatakis A. Pear: A fast and accurate illumina paired-end read merger. *Bioinformatics (Oxford, England).* 2014; 30 (5): 614-20.
19. Bengtsson-Palme J, Ryberg M, Hartmann M, Branco S, Wang Z, Godhe A, et al. Improved software detection and extraction of ITS1 and ITS2 from ribosomal ITS sequences of fungi and other eukaryotes for analysis of environmental sequencing data. *Methods in Ecology and Evolution.* 2013; 4 (10): 914-9.
20. UNITECommunity. Unite mothur release. 2017.

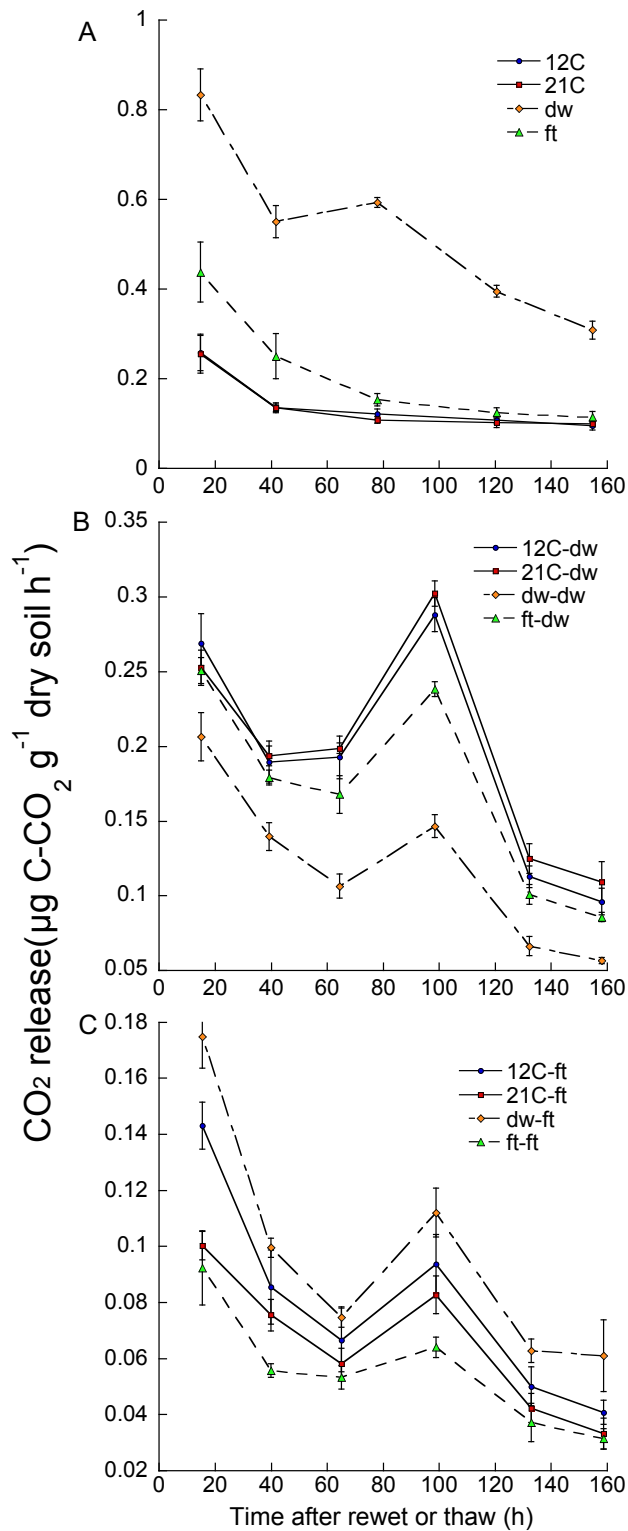

**Fig. S1** CO<sub>2</sub> release following rewetting or thawing for Experiment 1 (A), Experiment 2 (B) and Experiment 3 (C). A presents the CO<sub>2</sub> release Experiment 1, which tested the effect of drying-rewetting versus freezing-thawing. B presents the CO<sub>2</sub> release in Experiment 2, which tested the legacy of freezing-thawing on drying-rewetting. C presents the CO<sub>2</sub> release in Experiment 3, which tested the legacy of drying-rewetting on freezing-thawing. 12°C indicates pre-incubation at 12°C, while 21°C indicates pre-incubation at 21°C. DW indicates drying-rewetting cycle. FT indicates freezing-thawing cycle.

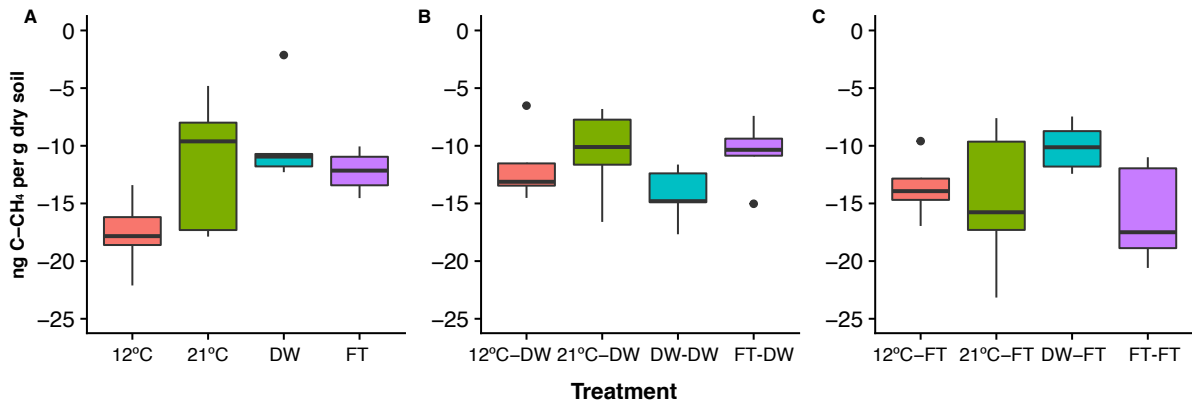

**Fig. S2** CH<sub>4</sub> uptake at 12°C by soil samples during a week upon rewetting and thawing. A presents the CH<sub>4</sub> uptake in Experiment 1, which tested the effect of drying-rewetting versus freezing-thawing. B presents the CH<sub>4</sub> uptake in Experiment 2, which tested the legacy of freezing-thawing on drying-rewetting. C presents the CH<sub>4</sub> uptake in Experiment 3, which tested the legacy of drying-rewetting on freezing-thawing. 12°C indicates pre-incubation at 12°C, while 21°C indicates pre-incubation at 21°C. DW indicates drying-rewetting cycle. FT indicates freezing-thawing cycle.

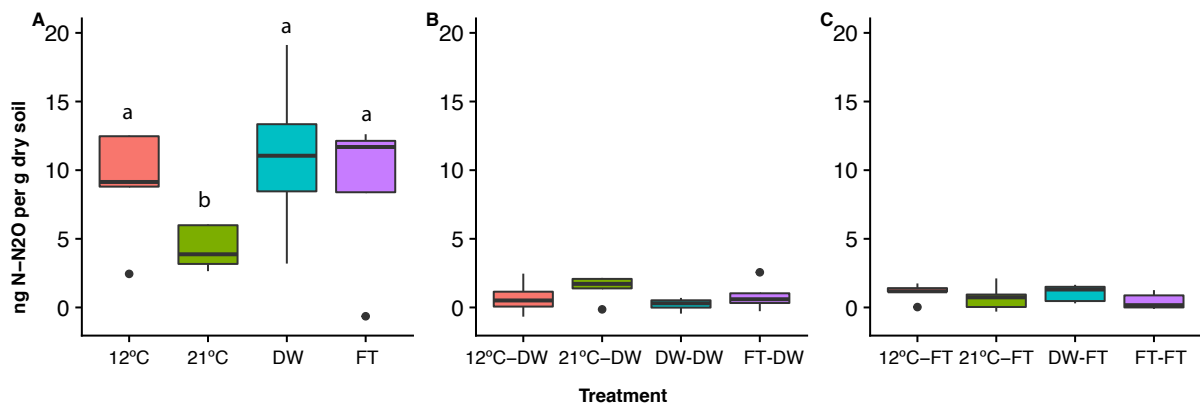

**Fig. S3** N<sub>2</sub>O released by soil samples incubated at 12°C during a week upon rewetting and thawing. A presents the N<sub>2</sub>O released in Experiment 1, which tested the effect of drying-rewetting versus freezing-thawing. B presents the N<sub>2</sub>O released in Experiment 2, which tested the legacy of freezing-thawing on drying-rewetting. C presents the N<sub>2</sub>O released in Experiment 3, which tested the legacy of drying-rewetting on freezing-thawing. 12°C indicates pre-incubation at 12°C, while 21°C indicates pre-incubation at 21°C. DW indicates drying-rewetting cycle. FT indicates freezing-thawing cycle. Different superscript letters denote significant different rates from the post hoc test at P < 0.05.

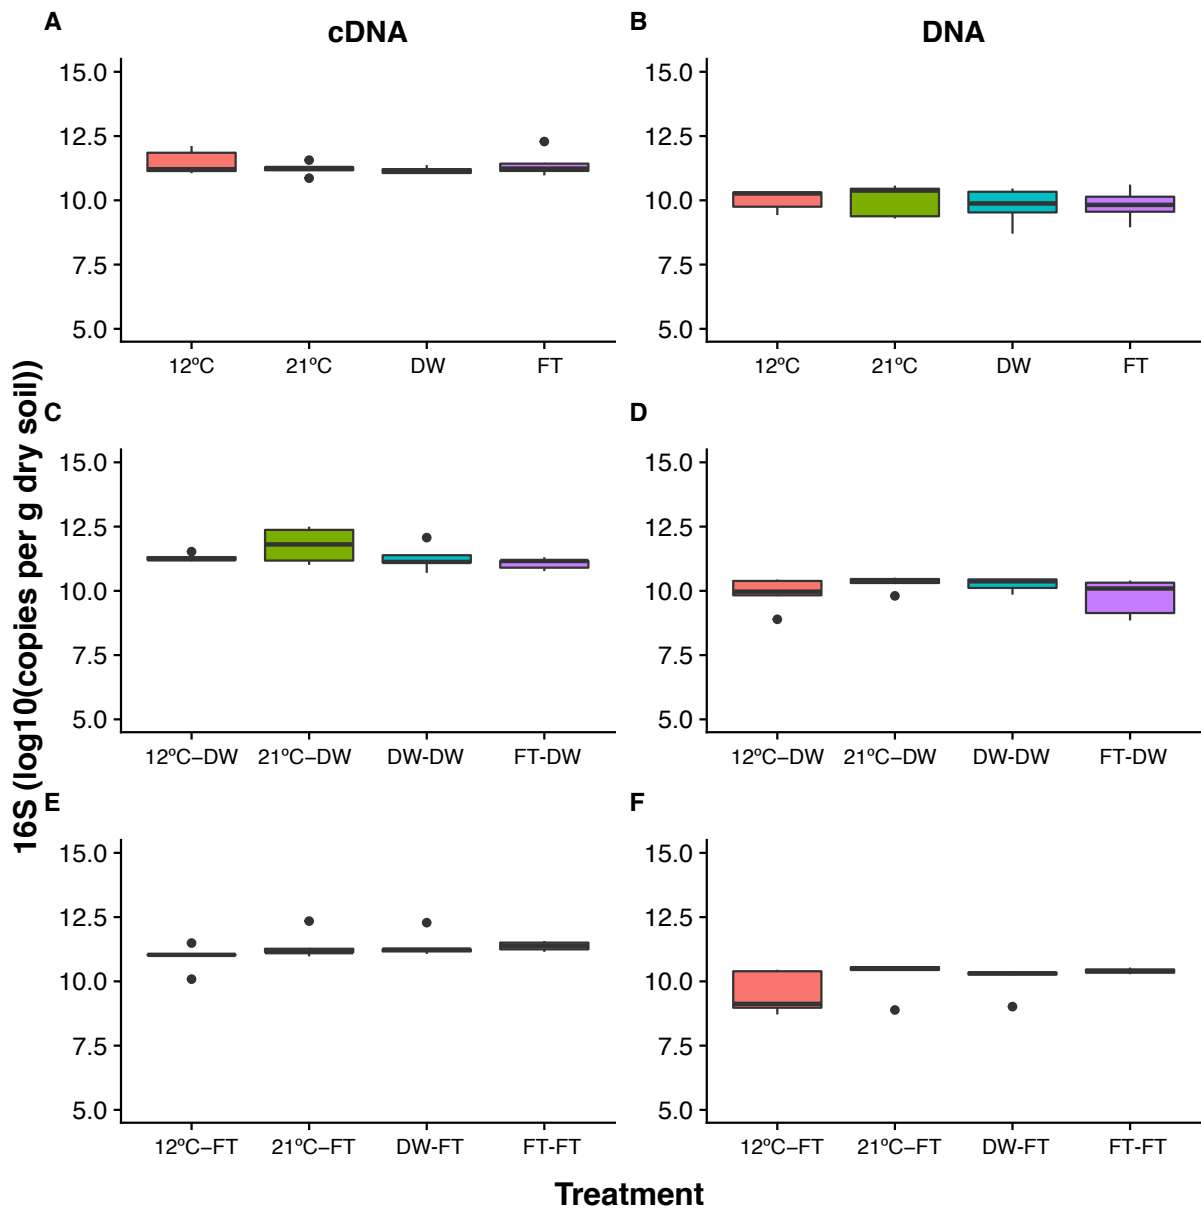

**Fig S4** Abundance of 16S cDNA reads (A,C,E) and DNA reads (B,D,F) according to treatments as measured by qPCR. The treatments are described in fig. 1. A,B presents the abundance in Experiment 1, which tested the effect of drying-rewetting versus freezing-thawing. C, D presents the abundance in Experiment 2, which tested the legacy of freezing-thawing on drying-rewetting. E, F presents the abundance in Experiment 3, which tested the legacy of drying-rewetting on freezing-thawing. 12°C indicates pre-incubation at 12°C, while 21°C indicates pre-incubation at 21°C. DW indicates a drying-rewetting cycle. FT indicates a freezing-thawing cycle. Different superscript letters denote differences at  $P < 0.05$  for a post hoc test for the mixed model.

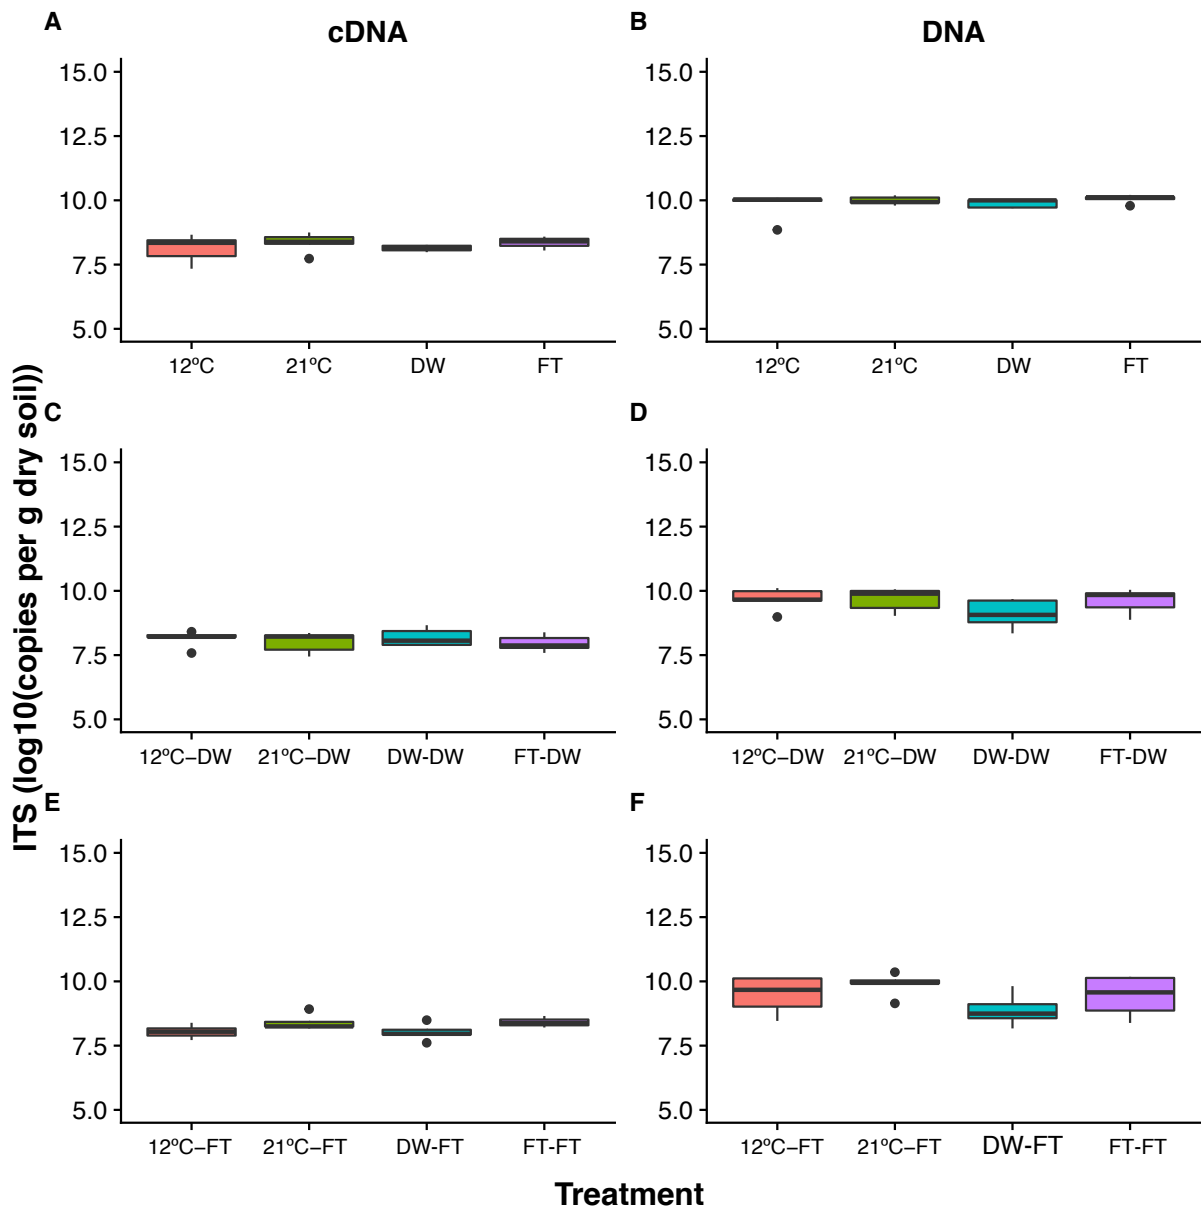

**Fig. S5** Abundance of ITS cDNA reads (A,C,E) and DNA reads (B,D,F) according to treatments as measured by qPCR. The treatments are described in fig. 1. A,B presents the abundance in Experiment 1, which tested the effect of drying-rewetting versus freezing-thawing. C,D presents the abundance in Experiment 2, which tested the legacy of freezing-thawing on drying-rewetting. E,F presents the abundance in Experiment 3, which tested the legacy of drying-rewetting on freezing-thawing. 12°C indicates pre-incubation at 12°C, while 21°C indicates pre-incubation at 21°C. DW indicates a drying-rewetting cycle. FT indicates a freezing-thawing cycle. Different superscript letters denote differences at  $P < 0.05$  for a post hoc test for the mixed model.

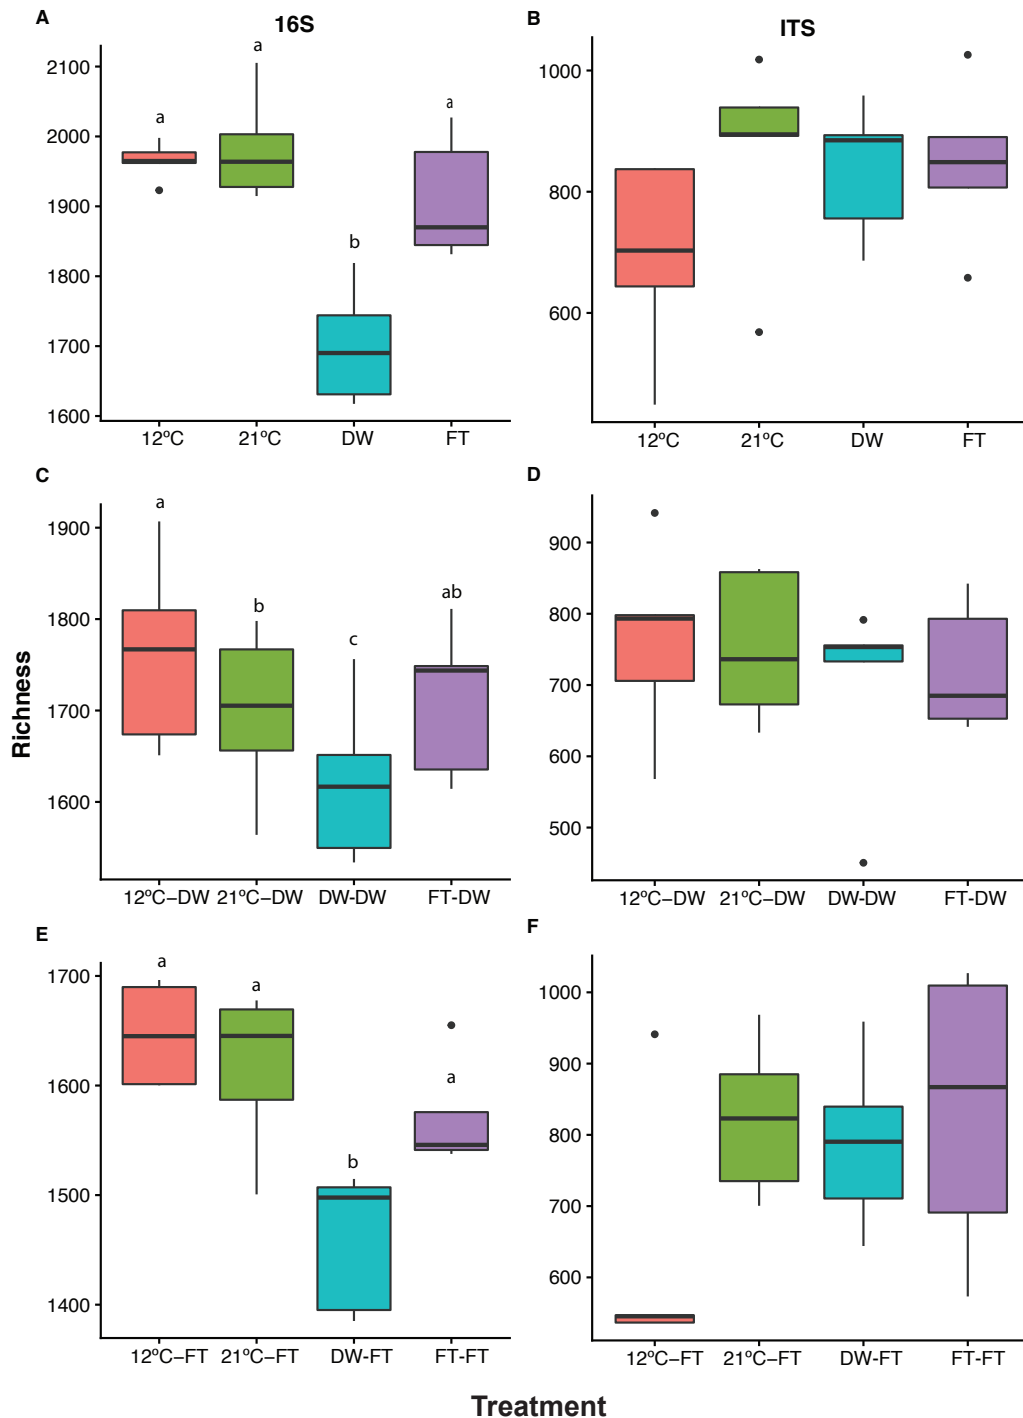

**Fig. S6** Richness of 16S rRNA (A,C,E) and ITS amplicon profiles (B,D,F) for cDNA according to treatments. The treatments are described in figure 1. A,B presents the richness in Experiment 1, which tested the effect of drying-rewetting versus freezing-thawing. C,D presents the richness in Experiment 2, which tested the legacy of freezing-thawing on drying-rewetting. E,F presents the richness in Experiment 3, which tested the legacy of drying-rewetting on freezing-thawing. 12°C indicates pre-incubation at 12°C, while 21°C indicates pre-incubation at 21°C. DW indicates a drying-rewetting cycle. FT indicates a freezing-thawing cycle. Different superscript letters denote differences at  $P < 0.05$  for a post hoc test for the mixed model.



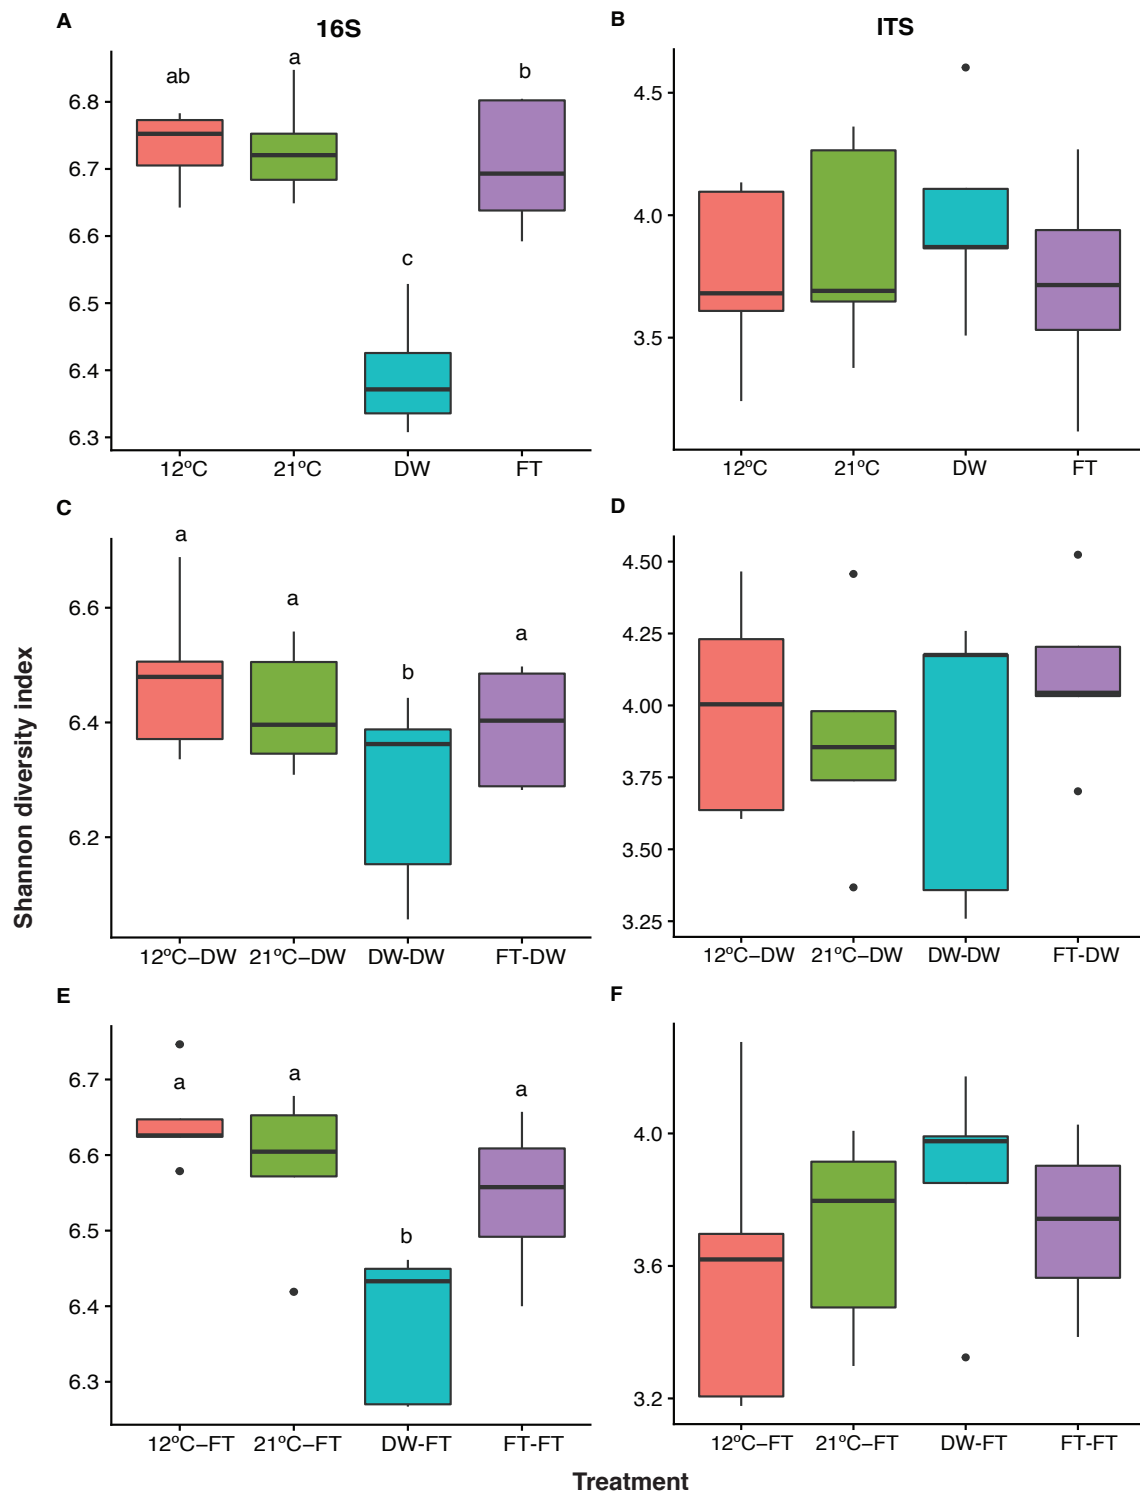

**Fig. S7** Shannon-Weaver diversity index of 16S rRNA (A,C,E) and ITS amplicon profiles (B,D,F) for cDNA according to treatments. The treatments are described in figure 1. A,B presents the r Shannon diversity index in Experiment 1, which tested the effect of drying-rewetting versus freezing-thawing. C,D presents the Shannon diversity index in Experiment 2, which tested the legacy of freezing-thawing on drying-rewetting. E,F presents the Shannon diversity index in Experiment 3, which tested the legacy of drying-rewetting on freezing-thawing. 12°C indicates pre-incubation at 12°C, while 21°C indicates pre-incubation at 21°C. DW indicates a drying-rewetting cycle. FT indicates a freezing-thawing cycle. Different superscript letters denote differences at  $P < 0.05$  for a post hoc test for the mixed model.

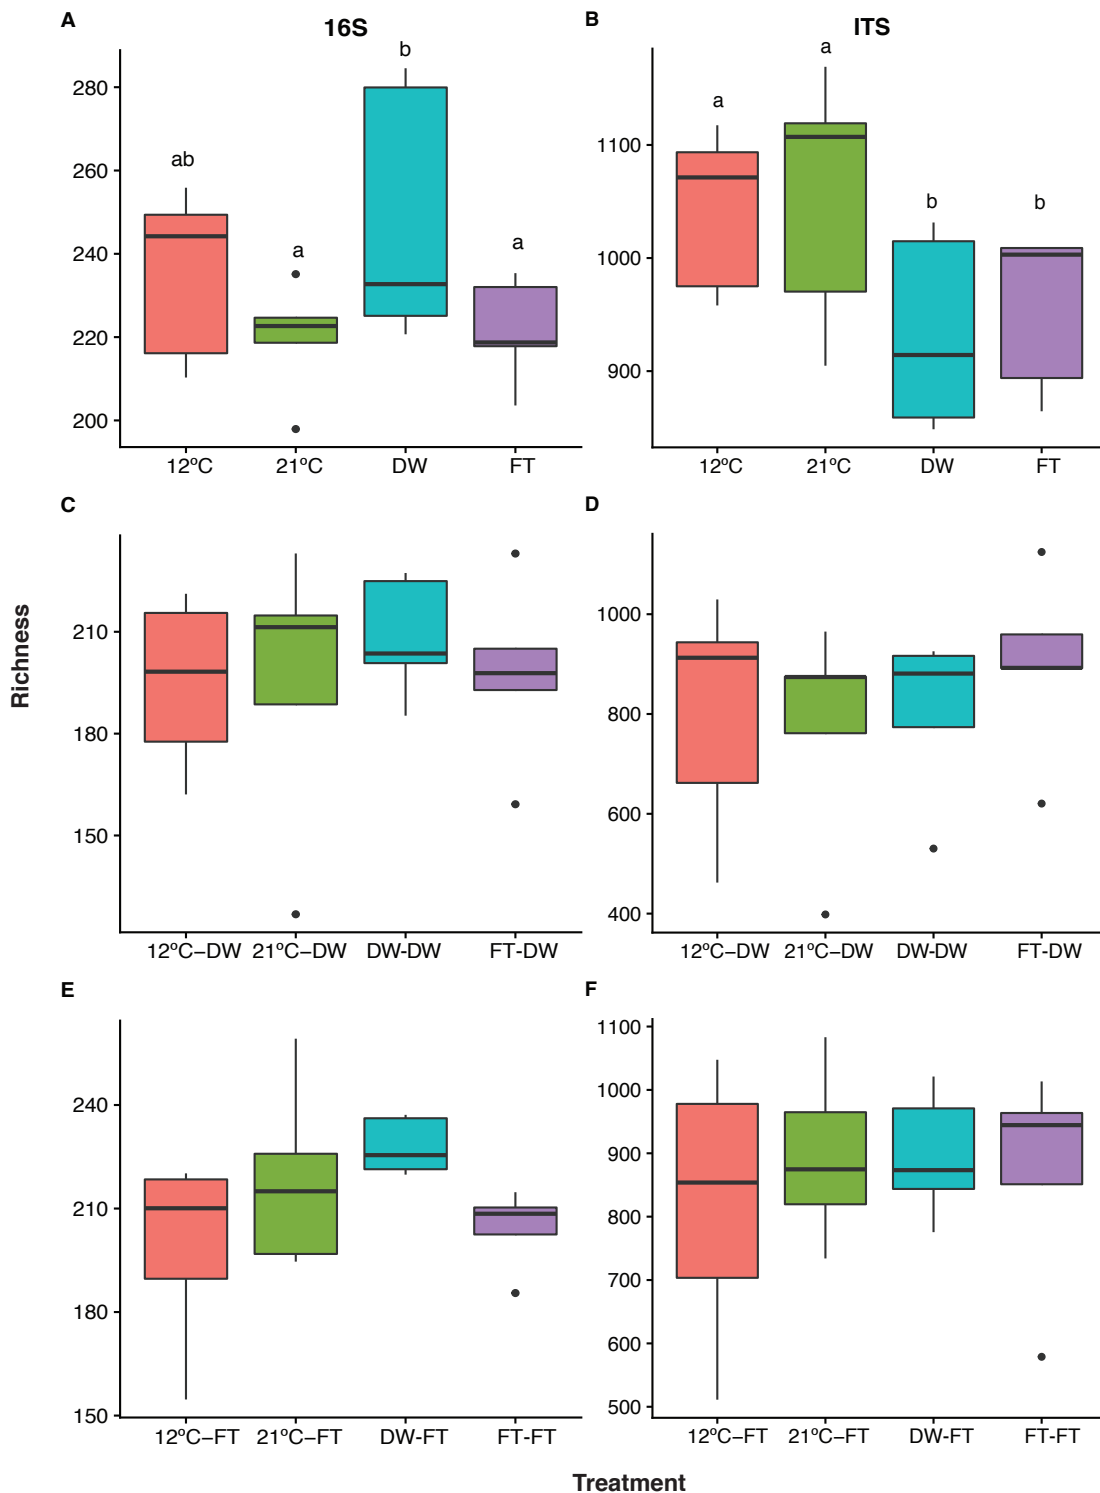

**Fig. S8** Richness of 16S (A,C,E) and ITS amplicon profiles (B,D,F) for DNA according to treatments. The treatments are described in figure 1. A,B presents the richness in Experiment 1, which tested the effect of drying-rewetting versus freezing-thawing. C,D presents the richness in Experiment 2, which tested the legacy of freezing-thawing on drying-rewetting. E,F presents the richness in Experiment 3, which tested the legacy of drying-rewetting on freezing-thawing. 12°C indicates pre-incubation at 12°C, while 21°C indicates pre-incubation at 21°C. DW indicates a drying-rewetting cycle. FT indicates a freezing-thawing cycle. Different superscript letters denote differences at  $P < 0.05$  for a post hoc test for the mixed model.

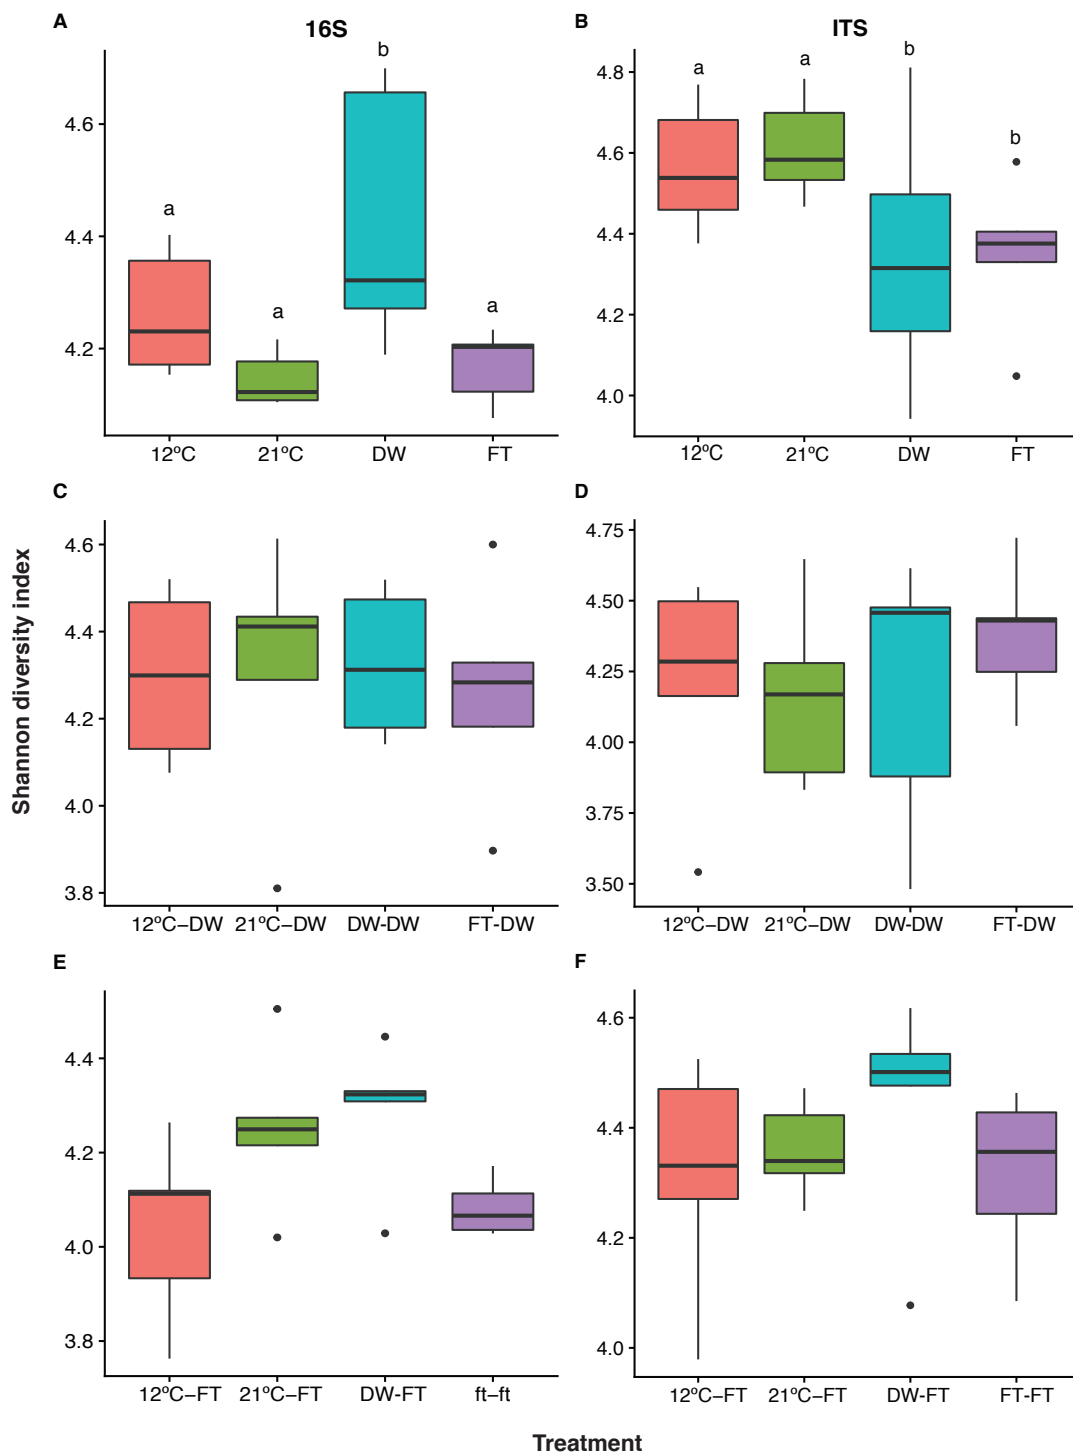

**Fig. S9** Shannon diversity index of 16S (A,C,E) and ITS amplicon profiles for DNA (B,D,F) according to treatments. The treatments are described in figure 1. A,B presents the r Shannon diversity index in Experiment 1, which tested the effect of drying-rewetting versus freezing-thawing. C,D presents the Shannon diversity index in Experiment 2, which tested the legacy of freezing-thawing on drying-rewetting. E,F presents the Shannon diversity index in Experiment 3, which tested the legacy of drying-rewetting on freezing-thawing. 12°C indicates pre-incubation at 12°C, while 21°C indicates pre-incubation at 21°C. DW indicates a drying-rewetting cycle. FT indicates a freezing-thawing cycle. Different superscript letters denote differences at  $P < 0.05$  for a post hoc test for the mixed model.

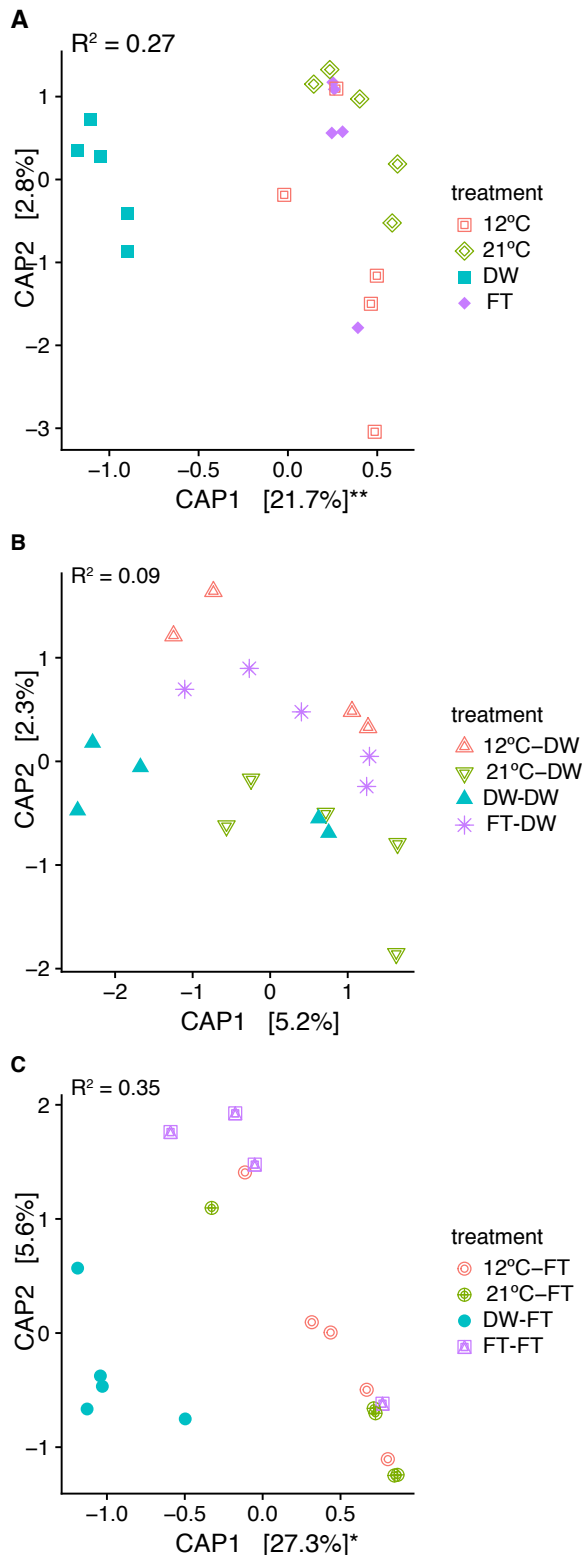

**Fig. S10** Partial distance-based redundancy analysis of prokaryotes for DNA on Bray-Curtis dissimilarity using capscale ordination. A is Experiment 1 where we tested if a drying-rewetting (DW) or a freezing-thawing (FT) cycle leave different legacies in the prokaryote community. B is from Experiment 2 where we tested how the different legacies affected the microbial response to a drying-rewetting cycle. C is from Experiment 3 where we tested how different legacies affected the microbial communities after an additional FT cycle. 12°C indicates pre-incubation at 12°C, while 21°C indicates pre-incubation at 21°C (see Fig. 1). Significance of axes is tested with a permutation test by axis: \*\*  $P < 0.01$ ; \*\*\*  $p < 0.001$ .

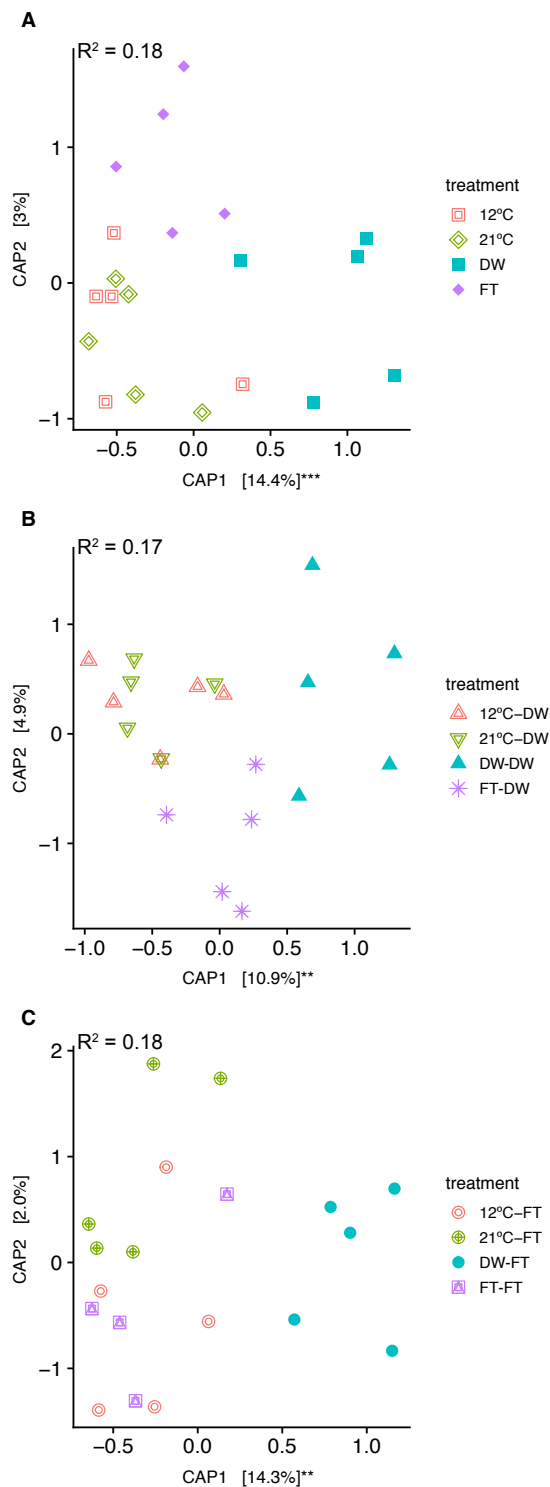

**Fig. S11** Partial distance-based redundancy analysis of ITS for DNA on Bray-Curtis dissimilarity using capscale ordination. A is Experiment 1 where we tested if a drying-rewetting (DW) or a freezing-thawing (FT) cycle leave different legacies in the prokaryote community. B is from Experiment 2 where we tested how the different legacies affected the microbial response to a drying-rewetting cycle. C is from Experiment 3 where we tested how different legacies affected the microbial communities after an additional FT cycle. 12°C indicates pre-incubation at 12°C, while 21°C indicates pre-incubation at 21°C (see Fig. 1). Significance of axes is tested with a permutation test by axis: \*\*  $P < 0.01$ ; \*\*\*  $p < 0.001$ .

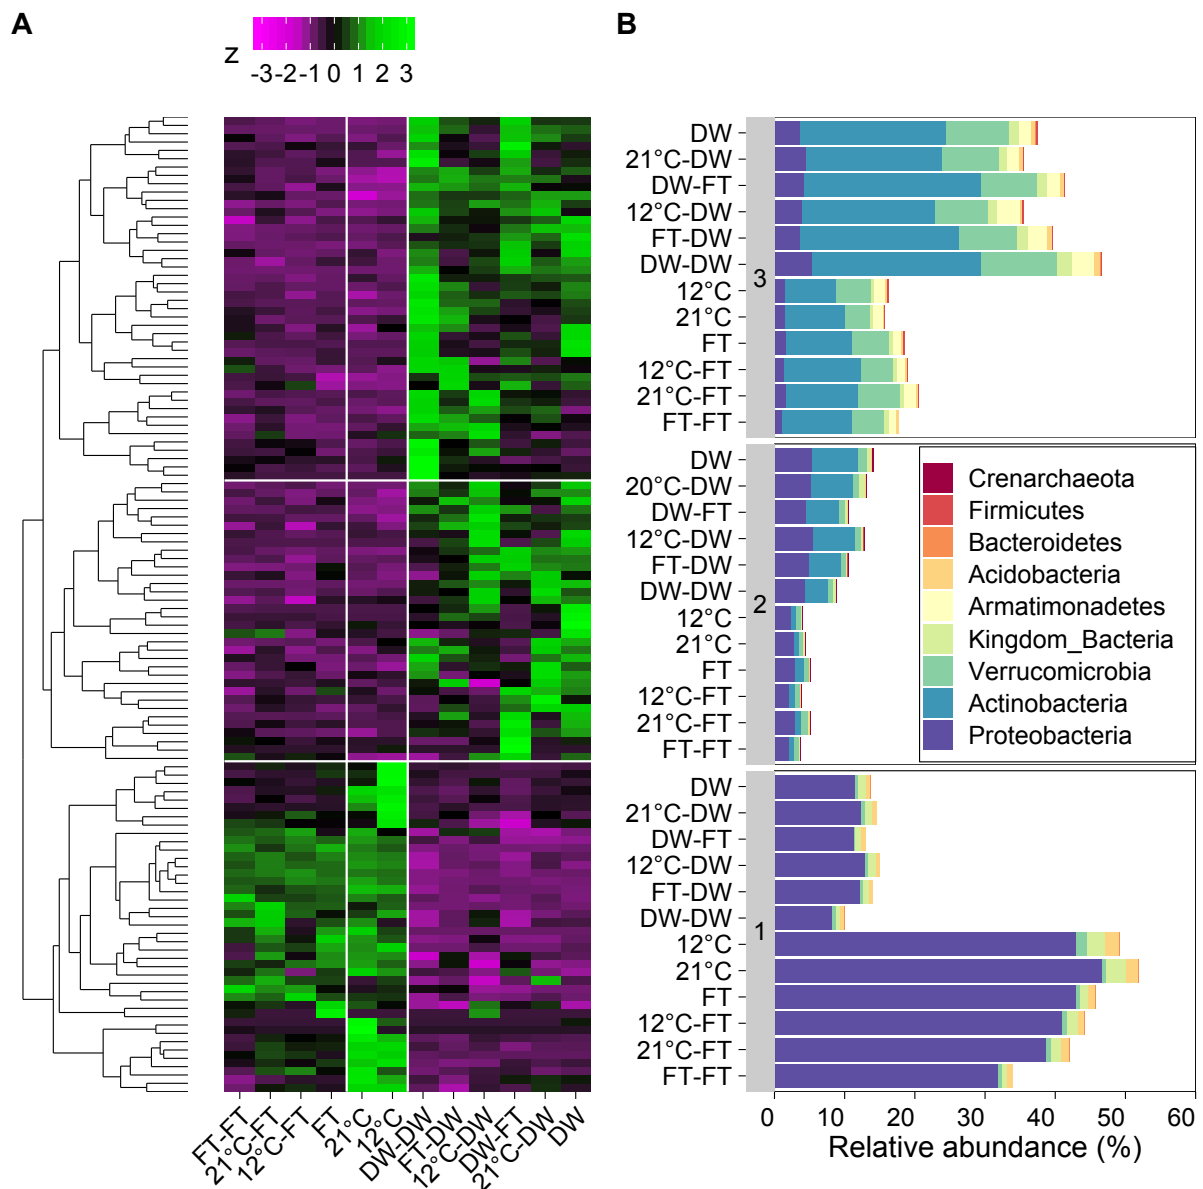

**Fig. S12** Response groups of 16S amplicons at DNA level. **A)** Heatmap of the z-score per OTU per treatment compared to the mean relative abundance. **B)** Barplot with the relative abundance per phylum per response group. Response groups are labeled with numbers and correspond to the groups in A, 1 is the bottom group, 3 is the top group, the rest is also shown in order.

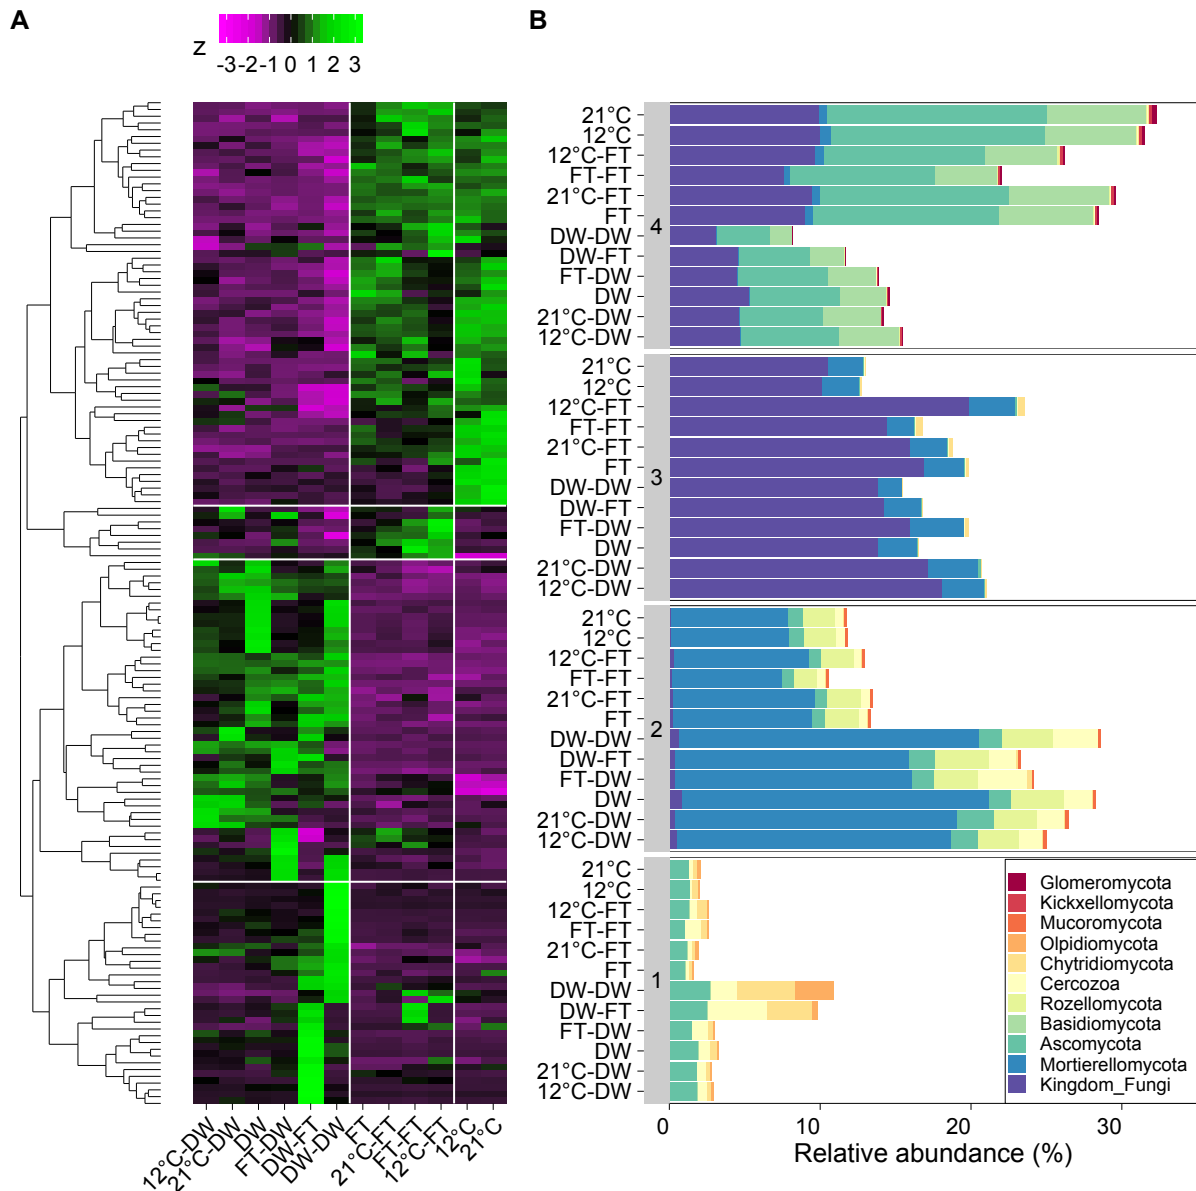

**Fig. S13** Response groups of ITS amplicons at cDNA level. **A)** Heatmap of the z-score per OTU per treatment compared to the mean relative abundance. **B)** Barplot with the relative abundance per phylum per response group. Response groups are labeled with numbers and correspond to the groups in A, 1 is the bottom group, 4 is the top group, the rest is also shown in order.

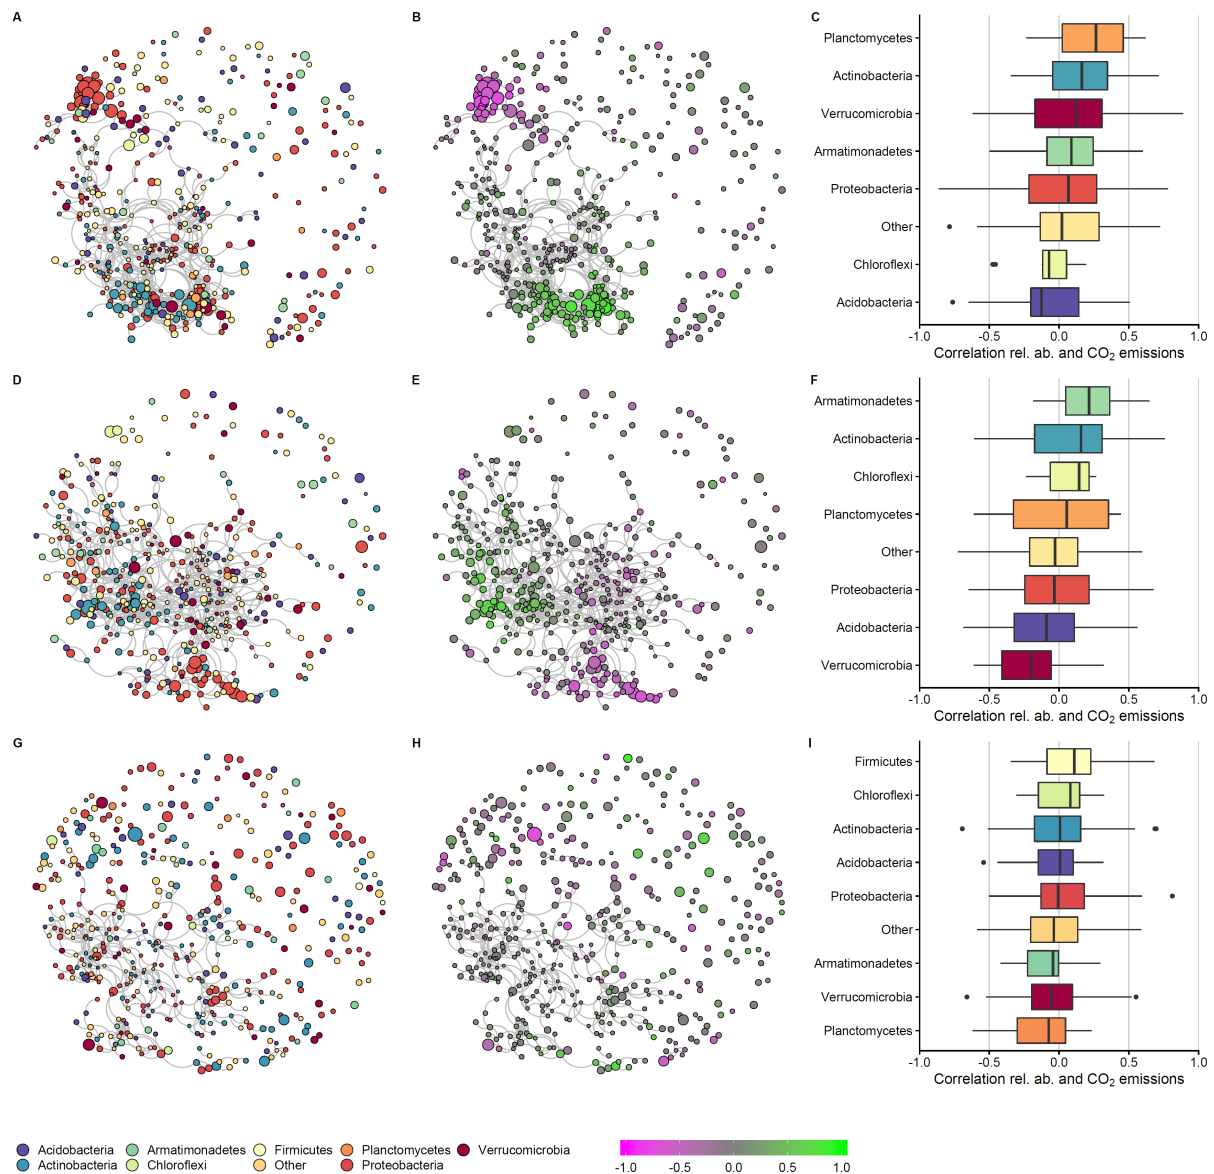

**Fig. S14** Co-response networks of the 16S OTUs at DNA level and correlation between relative abundance and CO<sub>2</sub> emissions. A), B), C) show experiment 1, single treatments. D), E), F) show experiment 2, single treatments followed by a drought treatment. G), H), I), show experiment 3, single treatments followed by a freezing-thawing treatment. A), D), G) co-response network with phylum overlay, legend below panel G). Node sizes are indicative for the mean relative abundance. B), E), H) show the co-response network with correlation between relative abundance and CO<sub>2</sub> emissions, legend is shown below panel H). C), F), I), shows boxplots with the correlations per OTU per phylum.



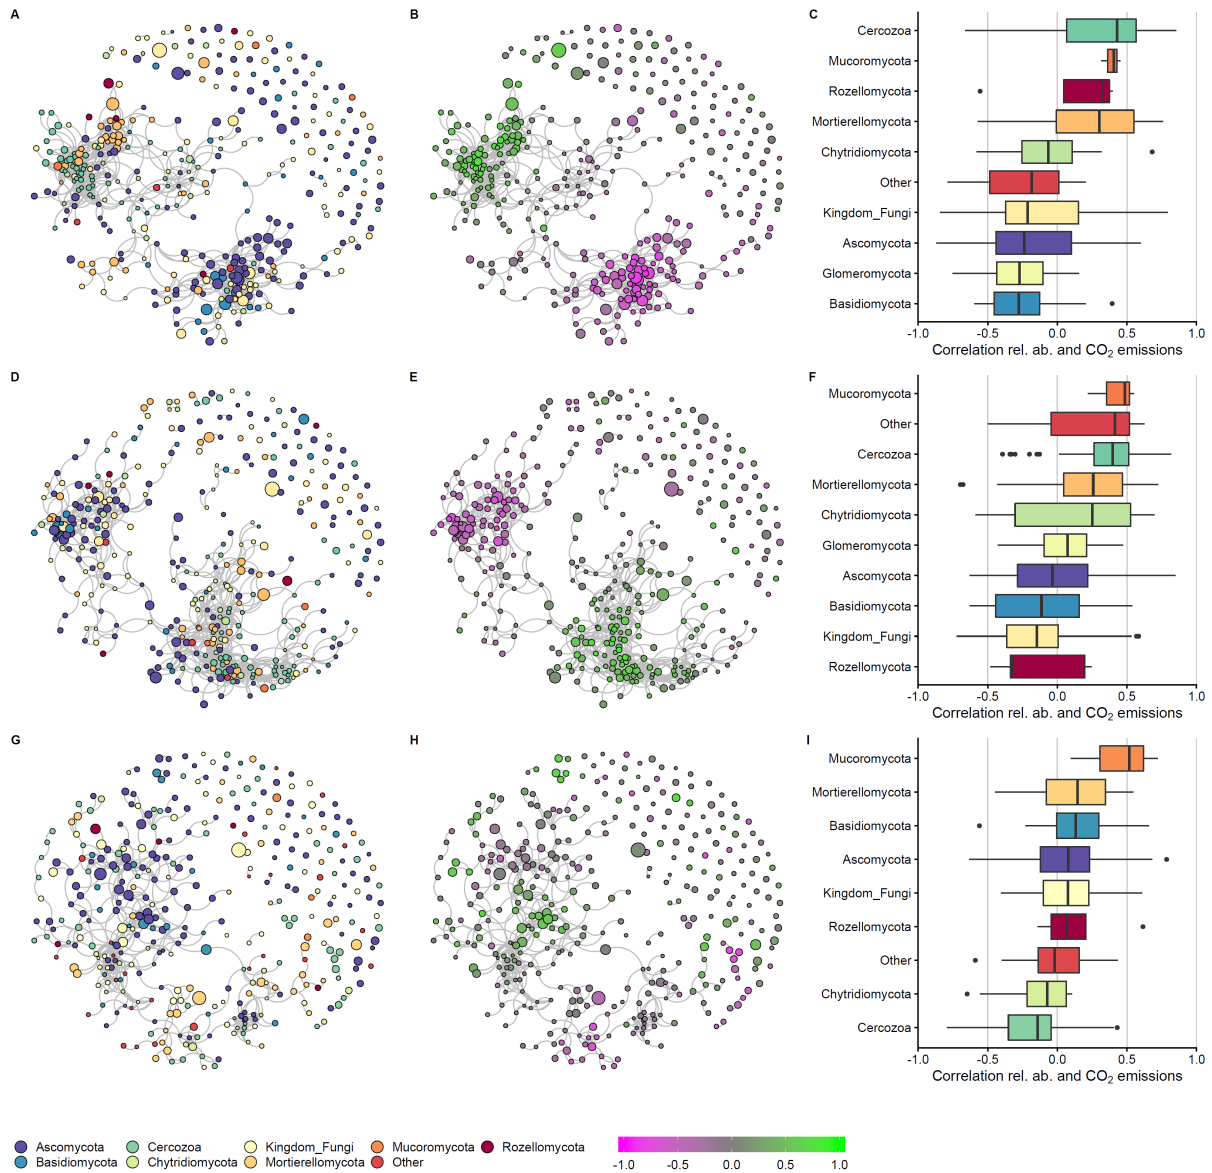

**Fig. S15** Co-response networks of the ITS OTUs at DNA level and correlation between relative abundance and CO<sub>2</sub> emissions. A), B), C) show experiment 1, single treatments. D), E), F) show experiment 2, single treatments followed by a drought treatment. G), H), I), show experiment 3, single treatments followed by a freeze-thaw treatments. A), D), G) co-response network with phylum overlay, legend below panel G). Node sizes are indicative for the mean relative abundance. B), E), H) show the co-response network with correlation between relative abundance and CO<sub>2</sub> emissions, legend is shown below panel H). C), F), I), shows boxplots with the correlations per OTU per phylum.

Table S1 Summary table of 16S rRNA transcripts. One sample was excluded as the extraction of RNA failed.

| <b>Samples</b> | <b>Experiment</b> | <b>jar</b> | <b>treatment</b> | <b>block</b> | <b>#reads<sup>1</sup></b> | <b>notes</b> |
|----------------|-------------------|------------|------------------|--------------|---------------------------|--------------|
| ANNELEIN-01    | exp 1             | 85         | DW               | 1            | 12127                     |              |
| ANNELEIN-21    | exp 1             | 86         | FT               | 1            | 16214                     |              |
| 87B116SV3V4    | exp 1             | 87         | 21°C             | 3            | 17307                     |              |
| ANNELEIN-49    | exp 1             | 88         | 12°C             | 4            | 16597                     |              |
| 8916SV3V4      | exp 1             | 89         | 21°C             | 4            | 11731                     |              |
| ANNELEIN-62    | exp 1             | 90         | DW               | 3            | 13882                     |              |
| 9116SV3V4      | exp 1             | 91         | FT               | 3            | 24196                     |              |
| ANNELEIN-09    | exp 1             | 92         | 12°C             | 3            | 11508                     |              |
| ANNELEIN-28    | exp 1             | 93         | FT               | 5            | 15421                     |              |
| ANNELEIN-33    | exp 1             | 94         | DW               | 4            | 12555                     |              |
| 9516SV3V4      | exp 1             | 95         | FT               | 4            | 12121                     |              |
| 9616SV3V4      | exp 1             | 96         | 21°C             | 2            | 14028                     |              |
| 9716SV3V4      | exp 1             | 97         | 21°C             | 5            | 22164                     |              |
| 87G116SV3V4    | exp 1             | 98         | 12°C             | 2            | 24322                     |              |
| ANNELEIN-26    | exp 1             | 99         | 12°C             | 1            | 11612                     |              |
| ANNELEIN-24    | exp 1             | 121        | DW               | 2            | 23655                     |              |
| ANNELEIN-64    | exp 1             | 121        | FT               | 2            | 13961                     |              |
| ANNELEIN-19    | exp 1             | 122        | 21°C             | 1            | 17500                     |              |
| ANNELEIN-17    | exp 1             | 123        | DW               | 5            | 17041                     |              |
| ANNELEIN-57    | exp 1             | 124        | 12°C             | 5            | <u>9951</u>               |              |
| 12516SV3V4     | exp 2             | 125        | DW-DW            | 2            | 14738                     |              |
| 12616SV3V4     | exp 2             | 126        | DW-DW            | 5            | 14461                     |              |
| 12116SV3V4     | exp 2             | 121        | DW-DW            | 3            | 15958                     |              |
| 13416SV3V4     | exp 2             | 134        | FT-DW            | 1            | 13185                     |              |
| 13516SV3V4     | exp 2             | 135        | FT-DW            | 2            | 18939                     |              |
| 14716SV3V4     | exp 2             | 147        | FT-DW            | 4            | 26822                     |              |
| 14816SV3V4     | exp 2             | 148        | FT-DW            | 5            | 30316                     |              |
| ANNELEIN-11    | exp 2             | 155        | 21°C-DW          | 2            | 12406                     |              |
| ANNELEIN-12    | exp 2             | 129        | 21°C-DW          | 3            | 12560                     |              |
| ANNELEIN-14    | exp 2             | 157        | DW-DW            | 4            | 13962                     |              |
| ANNELEIN-16    | exp 2             | 137        | 21°C-DW          | 4            | 22432                     |              |
| ANNELEIN-22    | exp 2             | 131        | 12°C-DW          | 1            | 12527                     |              |
| ANNELEIN-23    | exp 2             | 145        | 12°C-DW          | 3            | 15278                     |              |
| ANNELEIN-25    | exp 2             | 159        | 12°C-DW          | 5            | 15350                     |              |
| ANNELEIN-41    | exp 2             | 133        | FT-DW            | 3            | 11953                     |              |
| ANNELEIN-46    | exp 2             | 136        | 12°C-DW          | 2            | 13875                     |              |
| ANNELEIN-54    | exp 2             | 128        | 12°C-DW          | 4            | 12721                     |              |
| ANNELEIN-55    | exp 2             | 139        | DW-DW            | 1            | 12497                     |              |
| ANNELEIN-56    | exp 2             | 112        | 21°C-DW          | 1            | 24993                     |              |
| ANNELEIN-63    | exp 2             | 126        | 21°C-DW          | 5            | <u>12302</u>              |              |
| 11616SV3V4     | exp 3             | 116        | 21°C-FT          | 1            | 16385                     |              |
| 11916SV3V4     | exp 3             | 119        | FT-FT            | 3            | 12322                     |              |
| 12716SV3V4     | exp 3             | 127        | FT-FT            | 4            | 21221                     |              |
| 14316SV3V4     | exp 3             | 143        | 12°C-FT          | 4            | 30984                     |              |
| 14616SV3V4     | exp 3             | 146        | FT-FT            | 5            | 16806                     |              |
| 14916SV3V4     | exp 3             | 149        | 12°C-FT          | 2            | 25591                     |              |
| 15616SV3V4     | exp 3             | 156        | 21°C-FT          | 4            | 32866                     |              |
| ANNELEIN-12    | exp 3             | 124        | 21°C-FT          | 5            | 7035                      |              |
| ANNELEIN-15    | exp 3             | 142        | FT-FT            | 2            | <u>9511</u>               |              |
| ANNELEIN-21    | exp 3             | 130        | 12°C-FT          | 5            | 12895                     |              |

|             |       |     |         |   |       |                   |
|-------------|-------|-----|---------|---|-------|-------------------|
| ANNELEIN-27 | exp 3 | 123 | DW-FT   | 2 | 17981 |                   |
| ANNELEIN-29 | exp 3 | 115 | DW-FT   | 4 | 21743 |                   |
| ANNELEIN-30 | exp 3 | 140 | DW-FT   | 3 | 15250 |                   |
| ANNELEIN-31 | exp 3 | 144 | 12°C-FT | 1 | 14148 |                   |
| ANNELEIN-32 | exp 3 | 132 | DW-FT   | 1 | 24244 |                   |
| ANNELEIN-45 | exp 3 | 154 | 12°C-FT | 3 | 12157 |                   |
| ANNELEIN-47 | exp 3 | 111 | DW-FT   | 5 | 11122 |                   |
| ANNELEIN-48 | exp 3 | 114 | 21°C-FT | 3 | 23425 |                   |
| ANNELEIN-61 | exp 3 | 150 | 21°C-FT | 2 | 13361 |                   |
|             |       | 152 | FT-FT   | 1 |       | extraction failed |

<sup>1</sup>reads in italic and underlined. The rarefraction depth was determined by the number of reads in italic and underlined within the specific experiment (e.g. exp. 1, exp 2 or exp 3).

Table S2 Summary information of 16S rRNA gene amplicons. One sample was excluded as the extraction of DNA failed. One sample was excluded, because of too few reads.

| <b>samples</b> | <b>Experiment</b> | <b>jar</b> | <b>treatment</b> | <b>block</b> | <b>#reads<sup>1</sup></b> | <b>notes</b>  |
|----------------|-------------------|------------|------------------|--------------|---------------------------|---------------|
| 121D16SV3V4    | exp 1             | 121        | DW               | 2            | 4444                      |               |
| 121D16SV3V4    | exp 1             | 121        | FT               | 2            | 6478                      |               |
| 122D16SV3V4    | exp 1             | 122        | 21°C             | 1            | 7009                      |               |
| 123D16SV3V4    | exp 1             | 123        | DW               | 5            | 5832                      |               |
| 124D16SV3V4    | exp 1             | 124        | 12°C             | 5            | 8062                      |               |
| 85D16SV3V4     | exp 1             | 85         | DW               | 1            | 6831                      |               |
| 86D16SV3V4     | exp 1             | 86         | FT               | 1            | 13009                     |               |
| 87D16SV3V4     | exp 1             | 87         | 21°C             | 3            | 7993                      |               |
| 88D16SV3V4     | exp 1             | 88         | 12°C             | 4            | 1722                      |               |
| 89D16SV3V4     | exp 1             | 89         | 21°C             | 4            | 5151                      |               |
| 90D16SV3V4     | exp 1             | 90         | DW               | 3            | 3728                      |               |
| 91D16SV3V4     | exp 1             | 91         | FT               | 3            | 4211                      |               |
| 92D16SV3V4     | exp 1             | 92         | 12°C             | 3            | 15953                     |               |
| 93D16SV3V4     | exp 1             | 93         | FT               | 5            | 5214                      |               |
| 94D16SV3V4     | exp 1             | 94         | DW               | 4            | <u>1393</u>               |               |
| 95D16SV3V4     | exp 1             | 95         | FT               | 4            | 4515                      |               |
| 96D16SV3V4     | exp 1             | 96         | 21°C             | 2            | 3627                      |               |
| 97D16SV3V4     | exp 1             | 97         | 21°C             | 5            | 2469                      |               |
| 98D16SV3V4     | exp 1             | 98         | 12°C             | 2            | 3602                      |               |
| 99D16SV3V4     | exp 1             | 99         | 12°C             | 1            | 11250                     |               |
| 125D16SV3V4    | exp 2             | 125        | DW-DW            | 2            | <u>993</u>                |               |
| 126D16SV3V4    | exp 2             | 126        | DW-DW            | 5            | 1499                      |               |
| 129D16SV3V4    | exp 2             | 129        | 21°C-DW          | 3            | 1559                      |               |
| 112D16SV3V4    | exp 2             | 112        | 21°C-DW          | 1            | 12332                     |               |
| 121D16SV3V4    | exp 2             | 121        | DW-DW            | 3            | 7040                      |               |
| 126D16SV3V4    | exp 2             | 126        | 21°C-DW          | 5            | 3907                      |               |
| 128D16SV3V4    | exp 2             | 128        | 12°C-DW          | 4            | 6124                      |               |
| 131D16SV3V4    | exp 2             | 131        | 12°C-DW          | 1            | 7344                      |               |
| 133D16SV3V4    | exp 2             | 133        | FT-DW            | 3            | 1316                      |               |
| 134D16SV3V4    | exp 2             | 134        | FT-DW            | 1            | 7123                      |               |
| 135D16SV3V4    | exp 2             | 135        | FT-DW            | 2            | 7276                      |               |
| 136D16SV3V4    | exp 2             | 136        | 12°C-DW          | 2            | 1588                      |               |
| 137D16SV3V4    | exp 2             | 137        | 21°C-DW          | 4            | 9221                      |               |
| 139D16SV3V4    | exp 2             | 139        | DW-DW            | 1            | 1211                      |               |
| 145D16SV3V4    | exp 2             | 145        | 12°C-DW          | 3            | 259                       | too few reads |
| 147D16SV3V4    | exp 2             | 147        | FT-DW            | 4            | 2156                      |               |
| 148D16SV3V4    | exp 2             | 148        | FT-DW            | 5            | 3316                      |               |

|             |       |     |         |   |                   |
|-------------|-------|-----|---------|---|-------------------|
| 155D16SV3V4 | exp 2 | 155 | 21°C-DW | 2 | 1978              |
| 157D16SV3V4 | exp 2 | 157 | DW-DW   | 4 | 6360              |
| 159D16SV3V4 | exp 2 | 159 | 12°C-DW | 5 | 1146              |
| 111D16SV3V4 | exp 3 | 111 | DW-FT   | 5 | <u>1236</u>       |
| 114D16SV3V4 | exp 3 | 114 | 21°C-FT | 3 | 8305              |
| 115D16SV3V4 | exp 3 | 115 | DW-FT   | 4 | 2233              |
| 116D16SV3V4 | exp 3 | 116 | 21°C-FT | 1 | 12908             |
| 119D16SV3V4 | exp 3 | 119 | FT-FT   | 3 | 2836              |
| 123D16SV3V4 | exp 3 | 123 | DW-FT   | 2 | 2153              |
| 124D16SV3V4 | exp 3 | 124 | 21°C-FT | 5 | 12781             |
| 127D16SV3V4 | exp 3 | 127 | FT-FT   | 4 | 12930             |
| 130D16SV3V4 | exp 3 | 130 | 12°C-FT | 5 | 11902             |
| 132D16SV3V4 | exp 3 | 132 | DW-FT   | 1 | 2491              |
| 140D16SV3V4 | exp 3 | 140 | DW-FT   | 3 | 4507              |
| 142D16SV3V4 | exp 3 | 142 | FT-FT   | 2 | 1886              |
| 143D16SV3V4 | exp 3 | 143 | 12°C-FT | 4 | 5733              |
| 144D16SV3V4 | exp 3 | 144 | 12°C-FT | 1 | 2864              |
| 146D16SV3V4 | exp 3 | 146 | FT-FT   | 5 | 3339              |
| 149D16SV3V4 | exp 3 | 149 | 12°C-FT | 2 | 5400              |
| 150D16SV3V4 | exp 3 | 150 | 21°C-FT | 2 | 9868              |
| 154D16SV3V4 | exp 3 | 154 | 12°C-FT | 3 | 7840              |
| 156D16SV3V4 | exp 3 | 156 | 21°C-FT | 4 | 2578              |
|             |       | 152 | FT-FT   | 1 | Extraction failed |

<sup>1</sup>reads in italic and underlined. The rarefraction depth was determined by the number of reads in italic and underlined within the specific experiment (e.g. exp. 1, exp 2 or exp 3).

Table S3 Summary information of ITS transcripts. One sample was excluded as extraction of RNA failed.

| <b>Samples</b> | <b>Experiment</b> | <b>jar</b> | <b>treatment</b> | <b>block</b> | <b>#reads<sup>1</sup></b> | <b>notes</b> |
|----------------|-------------------|------------|------------------|--------------|---------------------------|--------------|
| 87B1ITS        | exp 1             | 87         | 21°C             | 3            | <u>43808</u>              |              |
| 87G1ITS        | exp 1             | 98         | 12°C             | 2            | 46085                     |              |
| 99ITS          | exp 1             | 99         | 12°C             | 1            | 54218                     |              |
| 85ITS          | exp 1             | 85         | DW               | 1            | 54871                     |              |
| 97ITS          | exp 1             | 97         | 21°C             | 5            | 54897                     |              |
| 95ITS          | exp 1             | 95         | FT               | 4            | 56656                     |              |
| 91E1ITS        | exp 1             | 91         | FT               | 3            | 57575                     |              |
| 86ITS          | exp 1             | 86         | FT               | 1            | 58505                     |              |
| 92ITS          | exp 1             | 92         | 12°C             | 3            | 58950                     |              |
| 90ITS          | exp 1             | 90         | DW               | 3            | 61160                     |              |
| 88ITS          | exp 1             | 88         | 12°C             | 4            | 64041                     |              |
| 123ITS         | exp 1             | 123        | DW               | 5            | 67095                     |              |
| 89ITS          | exp 1             | 89         | 21°C             | 4            | 67349                     |              |
| 121ITS         | exp 1             | 121        | DW               | 2            | 68542                     |              |
| 94A4ITS        | exp 1             | 94         | DW               | 4            | 73545                     |              |
| 121ITS         | exp 1             | 121        | FT               | 2            | 75374                     |              |
| 124ITS         | exp 1             | 124        | 12°C             | 5            | 78584                     |              |
| 96ITS          | exp 1             | 96         | 21°C             | 2            | 80832                     |              |
| 122ITS         | exp 1             | 122        | 21°C             | 1            | 84052                     |              |
| 93ITS          | exp 1             | 93         | FT               | 5            | 84315                     |              |
| 125ITS         | exp 2             | 125        | DW-DW            | 2            | 64591                     |              |
| 126ITS         | exp 2             | 126        | DW-DW            | 5            | 69839                     |              |
| 169ITS         | exp 2             | 129        | 21°C-DW          | 3            | 37166                     |              |
| 112ITS         | exp 2             | 112        | 21°C-DW          | 1            | 73254                     |              |

|        |       |     |         |   |                   |
|--------|-------|-----|---------|---|-------------------|
| 121ITS | exp 2 | 121 | DW-DW   | 3 | 51821             |
| 126ITS | exp 2 | 126 | 21°C-DW | 5 | 72121             |
| 128ITS | exp 2 | 128 | 12°C-DW | 4 | 48482             |
| 151ITS | exp 2 | 131 | 12°C-DW | 1 | 49123             |
| 133ITS | exp 2 | 133 | FT-DW   | 3 | 45196             |
| 134ITS | exp 2 | 134 | FT-DW   | 1 | 48821             |
| 135ITS | exp 2 | 135 | FT-DW   | 2 | 46848             |
| 136ITS | exp 2 | 136 | 12°C-DW | 2 | <u>31222</u>      |
| 137ITS | exp 2 | 137 | 21°C-DW | 4 | 58349             |
| 139ITS | exp 2 | 139 | DW-DW   | 1 | 38456             |
| 145ITS | exp 2 | 145 | 12°C-DW | 3 | 52733             |
| 147ITS | exp 2 | 147 | FT-DW   | 4 | 51668             |
| 148ITS | exp 2 | 148 | FT-DW   | 5 | 63177             |
| 155ITS | exp 2 | 155 | 21°C-DW | 2 | 34026             |
| 157ITS | exp 2 | 157 | DW-DW   | 4 | 44827             |
| 159ITS | exp 2 | 159 | 12°C-DW | 5 | 62464             |
| 111ITS | exp 3 | 111 | DW-FT   | 5 | 53144             |
| 114ITS | exp 3 | 114 | 21°C-FT | 3 | 50555             |
| 115ITS | exp 3 | 115 | DW-FT   | 4 | 58937             |
| 116ITS | exp 3 | 116 | 21°C-FT | 1 | 66523             |
| 119ITS | exp 3 | 119 | FT-FT   | 3 | 91976             |
| 123ITS | exp 3 | 123 | DW-FT   | 2 | <u>47409</u>      |
| 124ITS | exp 3 | 124 | 21°C-FT | 5 | 49622             |
| 127ITS | exp 3 | 127 | FT-FT   | 4 | 69343             |
| 130ITS | exp 3 | 130 | 12°C-FT | 5 | 72387             |
| 132ITS | exp 3 | 132 | DW-FT   | 1 | 48503             |
| 140ITS | exp 3 | 140 | DW-FT   | 3 | 80918             |
| 142ITS | exp 3 | 142 | FT-FT   | 2 | 70288             |
| 143ITS | exp 3 | 143 | 12°C-FT | 4 | 60938             |
| 144ITS | exp 3 | 144 | 12°C-FT | 1 | 48617             |
| 146ITS | exp 3 | 146 | FT-FT   | 5 | 83555             |
| 149ITS | exp 3 | 149 | 12°C-FT | 2 | 56948             |
| 150ITS | exp 3 | 150 | 21°C-FT | 2 | 75872             |
| 154ITS | exp 3 | 154 | 12°C-FT | 3 | 59064             |
| 156ITS | exp 3 | 156 | 21°C-FT | 4 | 81723             |
|        |       | 152 | FT-FT   | 1 | extraction failed |

<sup>1</sup>reads in italic and underlined. The rarefaction depth was determined by the number of reads in italic and underlined within the specific experiment (e.g. exp. 1, exp 2 or exp 3).

Table S4 Summary information of ITS rRNA gene amplicons. One sample was excluded as extraction of DNA failed.

| <b>Samples</b> | <b>Experiment</b> | <b>jar</b> | <b>treatment</b> | <b>block</b> | <b>#reads<sup>1</sup></b> | <b>notes</b> |
|----------------|-------------------|------------|------------------|--------------|---------------------------|--------------|
| 85DITS         | exp 1             | 85         | DW               | 1            | 38583                     |              |
| 86DITS         | exp 1             | 86         | FT               | 1            | 40634                     |              |
| 87DITS         | exp 1             | 87         | 21°C             | 3            | 48703                     |              |
| 88DITS         | exp 1             | 88         | 12°C             | 4            | 73634                     |              |
| 89DITS         | exp 1             | 89         | 21°C             | 4            | 41252                     |              |
| 90DITS         | exp 1             | 90         | DW               | 3            | 41284                     |              |
| 91DITS         | exp 1             | 91         | FT               | 3            | 43162                     |              |
| 92DITS         | exp 1             | 92         | 12°C             | 3            | 53437                     |              |
| 93DITS         | exp 1             | 93         | FT               | 5            | 62781                     |              |
| 94DITS         | exp 1             | 94         | DW               | 4            | 65077                     |              |
| 95DITS         | exp 1             | 95         | FT               | 4            | 53000                     |              |

|         |       |     |         |   |                   |
|---------|-------|-----|---------|---|-------------------|
| 96DITS  | exp 1 | 96  | 21°C    | 2 | 65190             |
| 97DITS  | exp 1 | 97  | 21°C    | 5 | 43755             |
| 98DITS  | exp 1 | 98  | 12°C    | 2 | 53988             |
| 99DITS  | exp 1 | 99  | 12°C    | 1 | 44253             |
| 121DITS | exp 1 | 121 | DW      | 2 | <u>34147</u>      |
| 121DITS | exp 1 | 121 | FT      | 2 | 43342             |
| 122DITS | exp 1 | 122 | 21°C    | 1 | 69062             |
| 123DITS | exp 1 | 123 | DW      | 5 | 68632             |
| 124DITS | exp 1 | 124 | 12°C    | 5 | 35471             |
| 125DITS | exp 2 | 125 | DW-DW   | 2 | <u>27405</u>      |
| 126DITS | exp 2 | 126 | DW-DW   | 5 | 46875             |
| 129DITS | exp 2 | 129 | 21°C-DW | 3 | 64838             |
| 112DITS | exp 2 | 112 | 21°C-DW | 1 | 50390             |
| 121DITS | exp 2 | 121 | DW-DW   | 3 | 38812             |
| 126DITS | exp 2 | 126 | 21°C-DW | 5 | 59064             |
| 128DITS | exp 2 | 128 | 12°C-DW | 4 | 67879             |
| 131DITS | exp 2 | 131 | 12°C-DW | 1 | 50877             |
| 133DITS | exp 2 | 133 | FT-DW   | 3 | 42426             |
| 134DITS | exp 2 | 134 | FT-DW   | 1 | 33015             |
| 135DITS | exp 2 | 135 | FT-DW   | 2 | 33621             |
| 136DITS | exp 2 | 136 | 12°C-DW | 2 | 38061             |
| 137DITS | exp 2 | 137 | 21°C-DW | 4 | 49652             |
| 139DITS | exp 2 | 139 | DW-DW   | 1 | 60055             |
| 145DITS | exp 2 | 145 | 12°C-DW | 3 | 61702             |
| 147DITS | exp 2 | 147 | FT-DW   | 4 | 48916             |
| 148DITS | exp 2 | 148 | FT-DW   | 5 | 47726             |
| 155DITS | exp 2 | 155 | 21°C-DW | 2 | 55698             |
| 157DITS | exp 2 | 157 | DW-DW   | 4 | 41167             |
| 159DITS | exp 2 | 159 | 12°C-DW | 5 | 55751             |
| 111DITS | exp 3 | 111 | DW-FT   | 5 | 55505             |
| 114DITS | exp 3 | 114 | 21°C-FT | 3 | <u>27217</u>      |
| 115DITS | exp 3 | 115 | DW-FT   | 4 | 56027             |
| 116DITS | exp 3 | 116 | 21°C-FT | 1 | 62409             |
| 119DITS | exp 3 | 119 | FT-FT   | 3 | 54157             |
| 123DITS | exp 3 | 123 | DW-FT   | 2 | 43212             |
| 124DITS | exp 3 | 124 | 21°C-FT | 5 | 36133             |
| 127DITS | exp 3 | 127 | FT-FT   | 4 | 60891             |
| 130DITS | exp 3 | 130 | 12°C-FT | 5 | 73528             |
| 132DITS | exp 3 | 132 | DW-FT   | 1 | 52195             |
| 140DITS | exp 3 | 140 | DW-FT   | 3 | 56349             |
| 142DITS | exp 3 | 142 | FT-FT   | 2 | 43386             |
| 143DITS | exp 3 | 143 | 12°C-FT | 4 | 56935             |
| 144DITS | exp 3 | 144 | 12°C-FT | 1 | 50280             |
| 146DITS | exp 3 | 146 | FT-FT   | 5 | 43271             |
| 149DITS | exp 3 | 149 | 12°C-FT | 2 | 49264             |
| 150DITS | exp 3 | 150 | 21°C-FT | 2 | 59390             |
| 154DITS | exp 3 | 154 | 12°C-FT | 3 | 36957             |
| 156DITS | exp 3 | 156 | 21°C-FT | 4 | 64256             |
|         |       | 152 | FT-FT   | 1 | Extraction failed |

<sup>1</sup>reads in italic and underlined. The rarefraction depth was determined by the number of reads in italic and underlined within the specific experiment (e.g. exp. 1, exp 2 or exp 3).

Table S5. Results of permutational multivariate analysis of variance using distance matrices using Adonis function on Bray-Curtis dissimilarities of 16S OTUs of cDNA and DNA. Exp.1, Exp.2, Exp.3 refer to the three experiments (See Fig. 1 for description of experiments). Bold P values indicate p-value < 0.05. sum sq is sum of squares.

| Molecule | Experiment |           | DF | Sum sq | R2   | F    | P            |
|----------|------------|-----------|----|--------|------|------|--------------|
| cDNA     | Exp.1      | Treatment | 3  | 0.54   | 0.30 | 2.29 | <b>0.002</b> |
|          |            | Residuals | 16 | 1.26   | 0.70 |      |              |
|          | Exp.2      | Treatment | 3  | 0.28   | 0.18 | 1.15 | 0.08         |
|          |            | Residuals | 16 | 1.29   | 0.82 |      |              |
|          | Exp.3      | Treatment | 3  | 0.43   | 0.22 | 1.41 | <b>0.009</b> |
|          |            | Residuals | 15 | 1.51   | 0.82 |      |              |
| DNA      | Exp.1      | Treatment | 3  | 0.69   | 0.27 | 1.93 | <b>0.003</b> |
|          |            | Residuals | 16 | 1.91   | 0.73 |      |              |
|          | Exp.2      | Treatment | 3  | 0.2992 | 0.09 | 0.50 | 0.86         |
|          |            | Residuals | 15 | 2.9677 | 0.91 |      |              |
|          | Exp.3      | Treatment | 3  | 1.01   | 0.35 | 2.65 | <b>0.012</b> |
|          |            | Residuals | 15 | 1.91   | 0.65 |      |              |

Table S6. Results of permutational multivariate analysis of variance using distance matrices using Adonis function on Bray-Curtis dissimilarities of ITS OTUs of cDNA and DNA. Exp.1, Exp.2, Exp.3 refer to the three experiments (See Fig. 1 for description of experiments). Bold P values indicate p-value < 0.05. sum sq is sum of squares.

| Molecule | Experiment |           | DF | Sum sq | R2   | F    | P                |
|----------|------------|-----------|----|--------|------|------|------------------|
| cDNA     | Exp.1      | Treatment | 3  | 0.375  | 0.21 | 1.34 | <b>&lt;0.001</b> |
|          |            | Residuals | 16 | 1.496  | 0.80 |      |                  |
|          | Exp.2      | Treatment | 3  | 0.26   | 0.13 | 0.78 | <b>0.005</b>     |
|          |            | Residuals | 16 | 1.78   | 0.87 |      |                  |
|          | Exp.3      | Treatment | 3  | 0.49   | 0.27 | 1.89 | <b>&lt;0.001</b> |
|          |            | Residuals | 15 | 1.29   | 0.73 |      |                  |
| DNA      | Exp.1      | Treatment | 3  | 0.32   | 0.18 | 1.2  | <b>0.002</b>     |
|          |            | Residuals | 16 | 1.44   | 0.82 |      |                  |
|          | Exp.2      | Treatment | 3  | 0.35   | 0.17 | 1.08 | <b>0.002</b>     |
|          |            | Residuals | 16 | 1.75   | 0.83 |      |                  |
|          | Exp.3      | Treatment | 3  | 0.32   | 0.18 | 1.08 | <b>0.003</b>     |
|          |            | Residuals | 15 | 1.48   | 0.82 |      |                  |
